# Supplementary material for: Delineating transitions during the evolution of specialised peroxisomes: Glycosome formation in kinetoplastid and diplonemid protists
Source: Front Cell Dev Biol. 2022 Sep 12;10:979269. doi: 10.3389/fcell.2022.979269 (PMC9512073; doi:10.3389/fcell.2022.979269)
Supplement: Supplementary file 3 [file Table1.XLSX]

## Sheet: Sheet1
					PTS
						T brucei	T vivax	T cruzi	L major	L tarent	Endotr mont	Lept pyrr	Lept seym	Crith fasc	Ango dean	Blech aya	Paratr conf	Bodo sal	Trypa borrelli	Diplo pal	Diplo japoni	Diplo ambula	Eugl grac	Eugl longa	Naegl grub	Naegl fowleri	Naegl lovani
Carbohydrate metabolism
Glycolysis
	Hexokinase				2	MsrRLnnileHI	MsrRLnnllqHI	MsaRLnnllqHI	MaaRVnnllsHI	MatRVnnllsHI	MaRLnnlmsHI	MasRVnnllsHI	MasRVnnlmsHI	MtsRVnnlmsHI	-	-	MaRLnhllnHI	-	-	MaaRLstivsHL	-	MatdldhRLstildHL	Incomplete	-	no orth	no orth	no ortho
	Hexokinase				2	MsrRLnnileHI	MsrRLnnllqHI	MsaRLnnllqHI	MaaRVnnllsHI	no orth	-	MasRVnnllsHI	no orth	MasRVnnlmsHI	-	no orth	no orth	no orth	-	no orth	no orth	no orth	no orth	no orth	no orth	no orth	no orth
	Glucokinase				1	no orth	no orth	AQL	SNL	SNL	SHL	SNL	SHL	AHL	AKL	SRL	-	SKL	SKM	SKL	AKL	SKL	-	no orth	-	-	-
										SHF
	Glucose 6-phosphate isomerase				1	SHL	SHL	SHL	AHL	AMY	AHL	AHL	AHL	AHL	SHL	SHL	SHL	no orth	SKL	AKL	SHL	SHL	-	-	-	SKL	-
	Phosphofructokinase				1	AKL	SKL	SKL	SKV	SKL	SKV	-	-	SKV	AKI	AKL	SKL	SKL	SKL	PKL	SKM	SKM	-	-	-	-	-
																		SRL		PKL
	Aldolase				2	MskRVevlltQL	-	MaqRVevlqtQL	MsRVtifqsQL	-	MstRVqvlqsQL	MssRVqiyqsQL	MstRVqiyqsQL	MsdRVqifqsQL	MsdRVsvlrtQL	MsRVqvlqsQL	MakRVevyqtQI	MakRIevlesQL	MssRVevyrsHL	MagRIevmksHL	no orth	MsaRIevfksHL	-	-	-	-	-
	Glyceraldehyde 3-phosphate dehydrogenase				1	AKL	AKL	ARL	AKM	-	AKM	AKM	SKM	SKL	PKL	SKM	SKL	AKL	MpvkvgingfgRIgrmvlQA	-	-		GKL	-	-	-	-
	Phosphoglycerate kinase		PGKc		1	SSL	PKL	-	-	-	-	-	-	PKL	SKI	no orth	no orth	SRL	AKL	SKL and GKL	SKL	AKL	TNA	-	SHI	-	-
			Pas-PGK		1	no orth	no orth	PRL	PKL	PKL	PKL	PKL	PKL	PKL	-	PKL	PKL	SRL	AFK	-	-	-	no orth	no orth	no orth	no orth	no orth
	Glucose 6-phosphate 1-epimerase				1	SKM	SNI	SNL	SSI	SNM	SNI	AKM	AKM	AKL	SKL	TKL	-	SKI	SKL	-	-	-	-	-	SKL	SKL	no orth
Gluconeogenesis
	Fructose-1,6-bisphosphatase				1	SKL	SKL	SKL	SKL	SKL	SKL	SKL	SKL	SKL	SKL	SHL	SKL	GHI	SKL	AKL	SKL	AKL	- (1) (2)	-	no orth	-	-
Auxiliary branches of glycolysis/gluconeogenesis
	PPDK				1	AKL	AKL	AKL	SKL	SKL	SKL	AKL	AKL	AKL	-	SKL	SKL	SKL	SKY	SKL	SKL	SKL	- (1)	-	-	-	no orth
	PEPCK				1	SRL	AHL	AHL	AHL	-	SHM	AHL	-	ARL	SKL	SHL	AKM	SKL	AKL	-	-	-	-	no orth	-	-	-
	FRD				1	SKI	SKI	SKM	AKI	AKI	SKI	AKI	AKM	AKI	no orth	SKL	SKL	SKL	-	SKL	AKL	AKL	-	-	-	-	-
	MDH				1	SKL	SKL	SKL	SHL	SKL	SKL	ANL	ANL	SNL	-	SKL	SNL	no orth	-	-	-	no orth	- (2) (3)	-	-	-	-
Pentose-phosphate pathway
	Transketolase				1	SHL	-	VHL	SKM	SKI	SKI	SKM	SKM	SKI	SQF	SKL	-	no orth	-	-	-	-	- (1) (2)	-	-		-
	6-Phosphogluconolactonase				1	AKF	no orth	-	-	-	-	-	-	-	-	-	-	ASL	no orth	AKL	SKL	AKL	- (2) (3)	-	-	-	-
	Ribokinase				1	-	-	ARA	-	-	-	-	-	-	-	-	-	-	SKY	-	AKL	AKL	-	-	-	-	-
	Ribulose 5-phosphate 3-epimerase				0.5	SRL	-	SHL	SHL	SQL	SRL	AKY	SHL	SKY	VQA	-	-	SHL	-	KLaeesqHI	no orth	no orth	-	-	-	-	-
					1	-	no orth	-	-	-	-	SHL	-	SHL	SKL	no orth	no orth	no orth	no orth	no orth	no orth	no orth	no orth	-	no orth	no orth	no orth
	Sedoheptulose-1,7-bisphosphatase				1	SKL	SKL	SKL	no orth	no orth	no orth	no orth	no orth	no orth	no orth	no orth	SKL	GKL	no orth	no orth	no orth	no orth	-	-	no orth	no orth	no orth
Glycerol Metabolism
	Glycerol Kinase				1	AKL	AKL	AKL	AKL	AKL	AKL	AKL	AKL	AKL	AKL	AKL	AKL	AKL	AKM	SKL	AKL	SKL	-	-	-	-	-
	Glycerol-3-phosphate dehydrogenase				1	SKM	SKL	-	SKL	SKL	SKL	SSL	CKL	SHL	SKL	ANL	SKL	-	no orth	-	AKL	AKL	-	-	-	-	-
Energy metabolism
	Arginine Kinase				1	SNL	SKI	-	no orth	no orth	no orth	no orth	no orth	no orth	no orth	-	no orth	-	no orth	-	-	ANL	-	-	no orth	no orth	no orth
	Arginase				1	no orth	no orth	no orth	AKL	AKL	AKM	SRL	SRL	SHL	SNL	no orth	no orth	AKL	Incomplete	no orth	no orth	no orth	no orth	no orth	-	-	no orth
	Adenylate Kinase				1	SKL	SKL	CKL	AKL	ANL	AKL	SKL	SKL	SKL	SNL	SKL	SKL	GKL	SKL	-	SKL	GDM	- (1)	-	-	-	-
Nucleotide-sugar/Galactose metabolism
	Glucosamine 6-Phosphate deaminase				1	-	SHM	SKM	SKL	SKM	AKL	AKL	AKL	AKL	no orth	SRM	no orth	SKL	no orth	SHL	-	SKL	no orth	no orth	-	-	-
	Glucosamine 6-phosphate N-acetyltransferase				None	-	-	-	-	-	-	-	-	-	-	-	-	-	-	-	no orth	no orth	no orth	no orth	-	-	-
	Phosphoacetylglucosamine mutase				None	-	-	-	-	-	-	-	-	-	-	-	-	-	-	-	-	-	-	-	-	SKL	-
	UDP-N-actylglucosamine pyrophosphorylase				1	SNM	SSL	GNM	ANM	ANM	-	ANM	ANM	ANM	PSL	SNI	-	SNL	-	-	-		-	-	-	-	no orth
	UDP-glucose pyrophosphorylase				1	-	no orth	-	-	-	-	-	-	-	-	-	-	GDV	SSL	-	-	VNL	-	VNL	-	-	SKL
	UDP-sugar pyrophosphorylase				1	no orth	Incomplete	AKL	AKL	AKL	AKL	AKL	AKL	AKL	SKL	no orth	no orth	AKM	no orth	SQL	SKL/AKL	AKL	PSL	-	Incomplete	no orth	no orth
	UDP-Galactose-4 epimerase				1	TKL	YDM	-	-	-	-	-	-	-	-	-	-	-	-	no orth	-	SKL	-	-	no orth	-	no orth
	Phosphomannose isomerase				1	SHM	AKL	AHM	-	-	-	-	-	SSL	AKI	SSL	CKM	NDL	SHL	-	-	-	-	-	-	-	-
	Phosphomannose mutase				none	-	-	-	-	-	-	-	-	-	-	-	-	-	-	no orth	-	-	-	-	-	no orth	no orth
	Phosphomannomutase-like				1	no orth	no orth	SNL	SKL	SKL	SRL	SKL	SRL	SNL	SKI	-	ARL	-	-	-	no orth	no orth	-	-	no orth	no orth	no orth
	Mannose-1-phosphate guanyltransferase| GDP-D-mannose pyrophosphorylase				none	-	-	-	-	-	-	-	-	-	-	-	-	-	-	no orth	no orth	no orth	no orth	no orth	no orth	-	no orth
	Galactokinase				1	no orth	no orth	GKL	SKL	SKL	-	AKM	SKL	SKL	AKL	no orth	no orth	-	no orth	no orth	-	-	-	no orth	no orth	no orth	no orth
					1	no orth	no orth	SNL	no orth	no orth	SSL	SSL	SSL	SSL	SSL	no orth	no orth	no orth	no orth	no orth	no orth	no orth	no orth	no orth	no orth	no orth	no orth
Note: Localization		(1) chloroplast
		(2) cytosol
		(3) mitochondrion
